# Supplementary material for: Downregulation of COMMD1 by miR-205 promotes a positive feedback loop for amplifying inflammatory- and stemness-associated properties of cancer cells
Source: PubMed Central journal article supplement — Cell Death Differ. 2015 Nov 20;23(5):841–52. doi: 10.1038/cdd.2015.147 (PMC4832103; doi:10.1038/cdd.2015.147), 2015-11-20
Supplement: cdd2015147x1.pdf [file cdd2015147x1.pdf]

**a**

```
miR-205 miR-491-5p
1 AGAUGAUGUAUGAAGGAGUUGGAGUUGUUGAAACCAAGGUGUCCAUGAUCCCUCCCCACUGACCUUUUCU
miR-7
71 AAGAAAUUUCUUGUGCCCAGCAUUGGUAUUAAAUCCUCGCAUUCAGUCUUCUGCCUCU 128
```

**b**

**hsa-miR-205/COMMD1 Alignment :** mirSVR score:-1.2126  
PhastCons score:0.6810

```
3' gucugaggccacCUUACUUCcu 5' hsa-miR-205
      | | | | | | |
1:5' -----agaugauGUAUGAAGGa 3' COMMD1
```

**hsa-miR-491-5p/COMMD1 Alignment :** mirSVR score:-0.5071  
PhastCons score:0.5830

```
3' ggaguaccuuccaAGGGGUGa 5' hsa-miR-491-5p
      | | | | |
39:5' guguccaugaucccUCCCCACu 3' COMMD1
```

**hsa-miR-7/COMMD1 Alignment :** mirSVR score:-0.9164  
PhastCons score:0.6347

```
3' uguuguuuuaGUGA----UCAGAAGGu 5' hsa-miR-7
      | | : | | | | | | |
99:5' uaaauccucgCAUUCAGUCUUCcu 3' COMMD1
```

**Supplementary Figure S1.** Analysis of miRNA target sites on 3'-UTR of COMMD1 mRNA using the algorithm miRanda (<http://www.microrna.org/>). **(a)** Predicted miRNA target sites on the 3'-UTR of COMMD1. **(b)** Sequence alignment and mirSVR scores for the putative target sites.

**a** COMMD1 3'-UTR wild type and mutant construct schemes

**hsa-miR-205** 3'-GUCUGAGGCCACCUUACUCCU-5'  
 COMMD1 3'-UTR **wt** 5'-...AGAUGAUGUAUGAAGGAGUUGGA...  
 COMMD1 3'-UTR **mut** 5'-...AGAUGAUUUCGUCCUUCGUUGGA...

**b** miR-205-sponge construct scheme



**S1** 5' - **ctaga**taaCAGACTCCGaccAATGAAGGAcgatCAGACTCCGaccAATGAAGGA**g**-3'  
**AS1** 3' - **t**ATTGTCTGAGGCTGGTTACTTCCTGCTAGTCTGAGGCTGGTTACTTCCT**cgatc**-5'  
**S2** 5' - **ctagc**ataaaCAGACTCCGaccAATGAAGGAcgatCAGACTCCGaccAATGAAGGA**g**-3'  
**AS2** 3' - **g**TATTGTCTGAGGCTGGTTACTTCCTGCTAGTCTGAGGCTGGTTACTTCCT**cttaa**-5'  
**S3** 5' - **aattc**ataaaCAGACTCCGaccAATGAAGGAcgatCAGACTCCGaccAATGAAGGA**g**-3'  
**AS3** 3' - **g**TATTGTCTGAGGCTGGTTACTTCCTGCTAGTCTGAGGCTGGTTACTTCCT**cctag**-5'

**Supplementary Figure S2.** Schematic illustration of (a) wild-type (wt) and mutant (mut) COMMD1 3'-UTR reporter constructs, and (b) miR-205-sponge construct containing six specific binding sites for miR-205.

**a**

|                                    |                                                                            |
|------------------------------------|----------------------------------------------------------------------------|
| Human shCOMMD1-1<br>TRCN0000167145 | Sense:5'-GATCCAAAGTCAACCAAATCTGAACTCGAGTTCAGAATTTGGTTGACTTTGTTTTTG-3'      |
|                                    | Antisense:5'-AATCAAAAACAAAGTCAACCAAATCTGAACTCGAGTTCAGAATTTGGTTGACTTTG-3'   |
| Human shCOMMD1-2<br>TRCN0000167998 | Sense:5'-GATCCAAGCTGCTGTCATTCCAAACTCGAGTTGGAAATGACAGCAGCTTGTTTTTG-3'       |
|                                    | Antisense:5'-AATCAAAAACAAGCTGCTGTCATTCCAAACTCGAGTTGGAAATGACAGCAGCTTG-3'    |
| Human shCOMMD1-3<br>TRCN0000168056 | Sense:5'-GATCCGAGGTCAAAGTCAACCAAATCTCGAGATTGGTTGACTTTGACCTCGTTTTTG-3'      |
|                                    | Antisense:5'-AATCAAAAACGAGGTCAAAGTCAACCAAATCTCGAGATTGGTTGACTTTGACCTCG-3'   |
| Human shCOMMD1-4<br>TRCN0000168045 | Sense:5'-GATCGCTCAAATACACACACCTGTTCTCGAGAACAGGTGTGTGTAATTGAGCTTTTT-3'      |
|                                    | Antisense:5'-AATTA AAAAGCTCAAATACACACACCTGTTCTCGAGAACAGGTGTGTGTAATTGAGC-3' |
| Mouse shCOMMD1-1<br>TRCN0000197798 | Sense:5'-GATCGTCTATTGCATCTGCAGACATCTCGAGATGCTGCAGATGCAATAGACTTTTTG-3'      |
|                                    | Antisense:5'-AATCAAAAAGTCTATTGCATCTGCAGACATCTCGAGATGCTGCAGATGCAATAGAC-3'   |
| Mouse shCOMMD1-2<br>TRCN0000350952 | Sense:5'-GATCGATGAAGTTAAAGTCAAGCAACTCGAGTTGCTTGACTTTAACTTCATCTTTTTG-3'     |
|                                    | Antisense:5'-AATCAAAAAGATGAAGTTAAAGTCAAGCAACTCGAGTTGCTTGACTTTAACTTCATC-3'  |
| shLuc<br>TRCN0000072249            | Sense:5'-GATCGCGGTTGCCAAGAGGTTCCATCTCGAGATGGAACCTCTTGGAACCGCTTTTTG-3'      |
|                                    | Antisense:5'-AATCAAAAAGCGGTTGCCAAGAGGTTCCATCTCGAGATGGAACCTCTTGGAACCGC-3'   |

**b**

**Supplementary Figure S3.** Development of short hairpin RNAs (shRNAs) for knockdown COMMD1 expression. Four shRNAs targeting different regions of the COMMD1 mRNA (shCOMMD1-1 to shCOMMD1-4) and a control shRNA targeting luciferase mRNA (shLuc) were designed and lentiviral expression vectors were constructed. **(a)** Sequences of sense and anti-sense oligonucleotides employed for generating these COMMD1-specific shRNAs. The shRNA sequences were obtained from the Public TRC Portal of the RNAi Consortium ([www.broadinstitute.org/rnai/public/gene/search](http://www.broadinstitute.org/rnai/public/gene/search)). The TRC identification numbers and oligonucleotide sequences are shown below the name of each shCOMMD1 and in the right column, respectively. **(b)** The efficiencies of these shRNAs were determined by achieving stable expression in SAS cells and analyzing COMMD1 expression by immunoblot analysis. The four COMMD1-specific shRNAs resulted in effective COMMD1 knockdown, while shLuc had no effect. shCOMMD1-4 (referred to as shCOMMD1 in this paper) was employed in experiments in this study. Samples were from COMMD1 over expressed cells for COMMD1 OE.



**Supplementary Figure S4.** COMMD1 regulates NF- $\kappa$ B activation in D121 cells. Phosphorylation levels of RelA in shLuc and shCOMMD1 stably transfected D121 cells were measured by flow cytometric analysis. Elevated levels of phosphorylated RelA (phospho-RelA) were detected in the COMMD1 knockdown cells. The left panel shows a representative histogram for the right bar figure for phospho-RelA levels in the shLuc and shCOMMD1 stably transfected D121 cells. Data represent mean  $\pm$  SD from three independent experiments. \* $P < 0.05$

Primers used in microRNA qRT-PCR

|                          |                                                             |
|--------------------------|-------------------------------------------------------------|
| miR-205_RT primer        | 5'-GTTGGCTCTGGTGCAGGGTCCGAGGTATTTCGCACCAGAGCCAACCAGACT-3'   |
| U6_RT primer             | 5'-GTTGGCTCTGGTGCAGGGTCCGAGGTATTTCGCACCAGAGCCAACAAAAATAT-3' |
| miR-205                  | forward 5'-GCATCATCCTTCATTCCACCGG-3'                        |
| U6                       | forward 5'-TTCCTCCGCAAGGATGACACGC-3'                        |
| Universal reverse primer | reverse 5'-GTGCAGGGTCCGAGGT-3'                              |
| Primary U6               | forward 5'-CTCGCTTCGGCAGCACA-3'                             |
|                          | reverse 5'-AACGCTTACGAATTTGCGT-3'                           |
| Primary hsa-miR-205      | forward 5'-ACAGGCTGAGGTTGACATGC-3'                          |
|                          | reverse 5'-CTCCTGAACTTCACTCCACTGAAA-3'                      |
| Primary mmu-miR-205      | forward 5'-CTTCACTCCACTGAAATCTGGTTG-3'                      |
|                          | reverse 5'-CTACACGAGGAGGCTTAGTAGACA-3'                      |

Synthetic oligonucleotide used to generate 3' UTR reporter constructs

|                   |                                                         |
|-------------------|---------------------------------------------------------|
| COMMD1 3' UTR Wt  | forward 5'-ATGTACGCGTAGATGATGATGAAGGAGTTGGAGTTGTTG-3'   |
|                   | reverse 5'-AGACAAGCTTAGAGGCAGGAAGACTGAATGCG-3'          |
| COMMD1 3' UTR Mut | forward 5'-ATGTACGCGTAGATGATTCGTCCTTCGTTGGAGTTGTTGAA-3' |

Synthetic oligonucleotide used to generate miR-205 sponge constructs

|           |                                                                |
|-----------|----------------------------------------------------------------|
| S1_XbaI   | 5'-CTAGATAACAGACTCCGACCAATGAAGGACGATCAGACTCCGACCAATGAAGGAG-3'  |
| AS1_NheI  | 5'-CTAGTCCTTCATTGGTCGGAGTCTGATCGTCCTTCATTGGTCGGAGTCTGTTAT-3'   |
| S2_NheI   | 5'-CTAGCATAACAGACTCCGACCAATGAAGGACGATCAGACTCCGACCAATGAAGGAG-3' |
| AS2_EcoRI | 5'-AATTCCTTCATTGGTCGGAGTCTGATCGTCCTTCATTGGTCGGAGTCTGTTATG-3'   |
| S3_EcoRI  | 5'-AATTCATAACAGACTCCGACCAATGAAGGACGATCAGACTCCGACCAATGAAGGAG-3' |
| AS3_BamHI | 5'-GATCCTCCTTCATTGGTCGGAGTCTGATCGTCCTTCATTGGTCGGAGTCTGTTATG-3' |

Synthetic oligonucleotide used to generate precursor miR-205 construct

|                 |                                              |
|-----------------|----------------------------------------------|
| Pre hsa-miR-205 | forward 5'-CATCGAATTCGGTCCTTGACATCTCCAAA-3'  |
|                 | reverse 5'-AGCAGGATCCCTGAAGAAGCACGCACACTC-3' |

**Supplementary Table S1.** Sequences of primers employed for microRNA , RT-qPCR, and generation of COMMD1 3'-UTR reporter, miR-205-sponge, and miR-205 overexpression constructs.

|               |                                     |
|---------------|-------------------------------------|
| COMMD1        | forward 5'-CGGAGCCAGCTATATCCAGA-3'  |
|               | reverse 5'-TTGGAAATGACAGCAGCTTG-3'  |
| ACTB          | forward 5'-TCCCTGGAGAAGAGCTACGA-3'  |
|               | reverse 5'-AGCACTGTGTTGGCGTACAG-3'  |
| GAPDH         | forward 5'-GAGTCAACGGATTGGTCGT-3'   |
|               | reverse 5'-GACAAGCTTCCCCTTCTCAG-3'  |
| c-MYC         | forward 5'-TTCGGGTAGTGGAAAACCAG-3'  |
|               | reverse 5'-CAGCAGCTCGAATTTCTTCC-3'  |
| SOX-2         | forward 5'-ACACCAATCCCATCCACACT-3'  |
|               | reverse 5'-GCAAACCTCCTGCAAAGCTC-3'  |
| OCT-4         | forward 5'-GAAGGATGTGGTCCGAGTGT-3'  |
|               | reverse 5'-GTGAAGTGAGGGCTCCCATA-3'  |
| KLF-4         | forward 5'-ACCCACACAGGTGAGAAACC-3'  |
|               | reverse 5'-ATGTGTAAGGCGAGGTGGTC-3'  |
| NANOG         | forward 5'-TTCCTCCTCCATGGATCTG-3'   |
|               | reverse 5'-ATCTGCTGGAGGCTGAGGTA-3'  |
| ALDH1         | forward 5'-TGTTAGCTGATGCCGACTTG-3'  |
|               | reverse 5'-CTTCTTAGCCCGCTCAACAC-3'  |
| ABC2          | forward 5'-GTGGCCTTGCTTGTATGAT-3'   |
|               | reverse 5'-AACAATTGCTGCTGTGCAAC-3'  |
| CD44          | forward 5'-AAGGTGGAGCAAACACAACC-3'  |
|               | reverse 5'-AGCTTTTCTTCTGCCACA-3'    |
| CD117         | forward 5'-AGAGACTTGGCAGCCAGAAA-3'  |
|               | reverse 5'-AGGGGCTGCTTCTAAAGAG-3'   |
| CD133         | forward 5'-GCCACCGCTCTAGATACTGC-3'  |
|               | reverse 5'-TGTGTGATGGGCTTGTAT-3'    |
| TNF- $\alpha$ | forward 5'-AACCTCCTCTTGCCATCAA-3'   |
|               | reverse 5'-CCAAAGTAGACCTGCCAGA-3'   |
| IL-1 $\beta$  | forward 5'-ACGATGCACCTGTACGATCA-3'  |
|               | reverse 5'-TCTTTCAACACGCAGGACAG-3'  |
| IL-6          | forward 5'-TACCCCAAGGAGAAGATTCC-3'  |
|               | reverse 5'-TTTCTGCCAGTGCTTCTT-3'    |
| IL-8          | forward 5'-GTGCAGTTTGCCAAGGAGT-3'   |
|               | reverse 5'-CTCTGCACCCAGTTTCTT-3'    |
| CXCL1         | forward 5'-AGGGAATTCACCCCAAGAAC-3'  |
|               | reverse 5'-CACCAGTGAGCTTCTCTC-3'    |
| CCL2          | forward 5'-CCCCAGTCACCTGCTGTAT-3'   |
|               | reverse 5'-TGGAATCCTGAACCCACTTC-3'  |
| MMP9          | forward 5'-CTCGAATTTGACAGCGACA-3'   |
|               | reverse 5'-GCCATTCACGTCGTCCTTAT-3'  |
| NOS2          | forward 5'-ACAAGCCTACCCCTCCAGAT-3'  |
|               | reverse 5'-TCCCGTCAGTTGGTAGGTTCC-3' |

**Supplementary Table S2.** Sequences of forward and reverse primers employed for PCR amplification of human genes.

|               |                                    |
|---------------|------------------------------------|
| Commd1        | forward 5'-GCTCAAACCAAAAAGCAAGG-3' |
|               | reverse 5'-GTTGAGTGCCGTGACTGAGA-3' |
| Actb          | forward 5'-AGCCATGTACGTAGCCATCC-3' |
|               | reverse 5'-CTCTCAGCTGTGGTGGTAA-3'  |
| Gapdh         | forward 5'-ACCCAGAAGACTGTGGATGG-3' |
|               | reverse 5'-CACATTGGGGGTAGGAACAC-3' |
| c-Myc         | forward 5'-ACACGGAGGAAAACGACAAG-3' |
|               | reverse 5'-TCGTCTGCTTGAATGGACAG-3' |
| Sox-2         | forward 5'-AAGGGTTCTTGCTGGGTTT-3'  |
|               | reverse 5'-AGACCACGAAAACGGTCTTG-3' |
| Oct-4         | forward 5'-AAGCCCTCCCTACAGCAGAT-3' |
|               | reverse 5'-CTGGGAAAGGTGTCCCTGTA-3' |
| Klf-4         | forward 5'-GCAGTCACAAGTCCCCTCTC-3' |
|               | reverse 5'-CTGTGTGAGTTCGCAGGTGT-3' |
| Nanog         | forward 5'-CCAGTGGAGTATCCCAGCAT-3' |
|               | reverse 5'-GAAGTTATGGAGCGGAGCAG-3' |
| Aldh1         | forward 5'-GCACTCAATGGTGGGAAAGT-3' |
|               | reverse 5'-TTTGCCACACACTCCAATA-3'  |
| Abcg2         | forward 5'-CCATTCATCAGCCTCGGTAT-3' |
|               | reverse 5'-AATCCGCAGGGTGTGTAG-3'   |
| Cd44          | forward 5'-TGGATCCGAATTAGCTGGAC-3' |
|               | reverse 5'-AGCTTTTCTCTGCCACA-3'    |
| Cd117         | forward 5'-GGGCTAGCCAGAGACATCAG-3' |
|               | reverse 5'-AGGAGAAGAGCTCCAGAGG-3'  |
| Cd133         | forward 5'-GAAAAGTTGCTCTGCGAACC-3' |
|               | reverse 5'-TCTCAAGCTGAAAAGCAGCA-3' |
| Tnf- $\alpha$ | forward 5'-AGCCCCAGTCTGTATCCTT-3'  |
|               | reverse 5'-CTCCCTTGCAGAACTCAGG-3'  |
| Il-1 $\beta$  | forward 5'-CAGGCAGGCAGTACTACTCA-3' |
|               | reverse 5'-AGCTCATATGGGTCCGACAG-3' |
| Il-6          | forward 5'-AGTTGCCTTCTGGGACTGA-3'  |
|               | reverse 5'-TCCACGATTTCCAGAGAAC-3'  |
| Il-8          | forward 5'-CGTCCCTGTGACTCAAGA-3'   |
|               | reverse 5'-TAATTGGGCCAACAGTAGCC-3' |
| Cxcl1         | forward 5'-GCTGGGATTACCTCAAGAA-3'  |
|               | reverse 5'-CTTGGGGACACCTTTTAGCA-3' |
| Ccl2          | forward 5'-CAGGTCCCTGTCATGCTTCT-3' |
|               | reverse 5'-TCTGGACCCATTCCTTCTTG-3' |
| Mmp9          | forward 5'-GAAGGCAAACCTGTGTGTT-3'  |
|               | reverse 5'-AGAGTACTGCTTGCCAGGA-3'  |
| Nos2          | forward 5'-CACCTGGAGTTCACCCAGT-3'  |
|               | reverse 5'-ACCACTCGTACTGGGATGC-3'  |

**Supplementary Table S3.** Sequences of forward and reverse primers employed for PCR amplification of mouse genes.
